# Supplementary material
Source: Royal Society of Chemistry journal article supplement (doi:10.1039/d6ay00590j)
Supplement: d6ay00590j1.pdf [file d6ay00590j1.pdf]

## Supplementary Data

**For**

**Quartz crystal microbalance determination of acephate based on molecularly  
imprinting polymer and sulphur doped copper ferrites**

Bahar Bankođlu Yola

*Department of Engineering Basic Sciences, Faculty of Engineering and Natural Sciences, Gaziantep Islam  
Science and Technology University, Gaziantep, 27260, Türkiye*

*Correspondence: bahar.bankoglu@gibtu.edu.tr; Tel.: +90-3429097500; Fax: 08502589800*

## 2.1. Chemicals and instrumentation

Scanning electron microscopy (SEM, ZEISS EVO 50 SEM, Tokyo, Japan), Fourier Transform Infrared Spectroscopy (FTIR, Bruker Optics Inc., Ettlingen, Germany), X-ray photoelectron spectroscopy (XPS, PHI 5000 Versa Probe spectrometer), and Rigaku X-ray diffractometer (XRD, Germany) were used for the structural characterizations. Nano magnetics instrument mode atomic force microscopy (AFM, Tokyo, Japan) was used for the observation of surface thicknesses and INFICON Acquires Maxtek QCM system was utilized for analytical applications.

## 3.4. Sensitivity of MIP/S@CuFe<sub>2</sub>O<sub>4</sub>/QCM

$$LOQ = 10.0 S / m$$

$$LOD = 3.3 S / m$$

S: Standard deviation of the intercept and m: Slope of the regression line

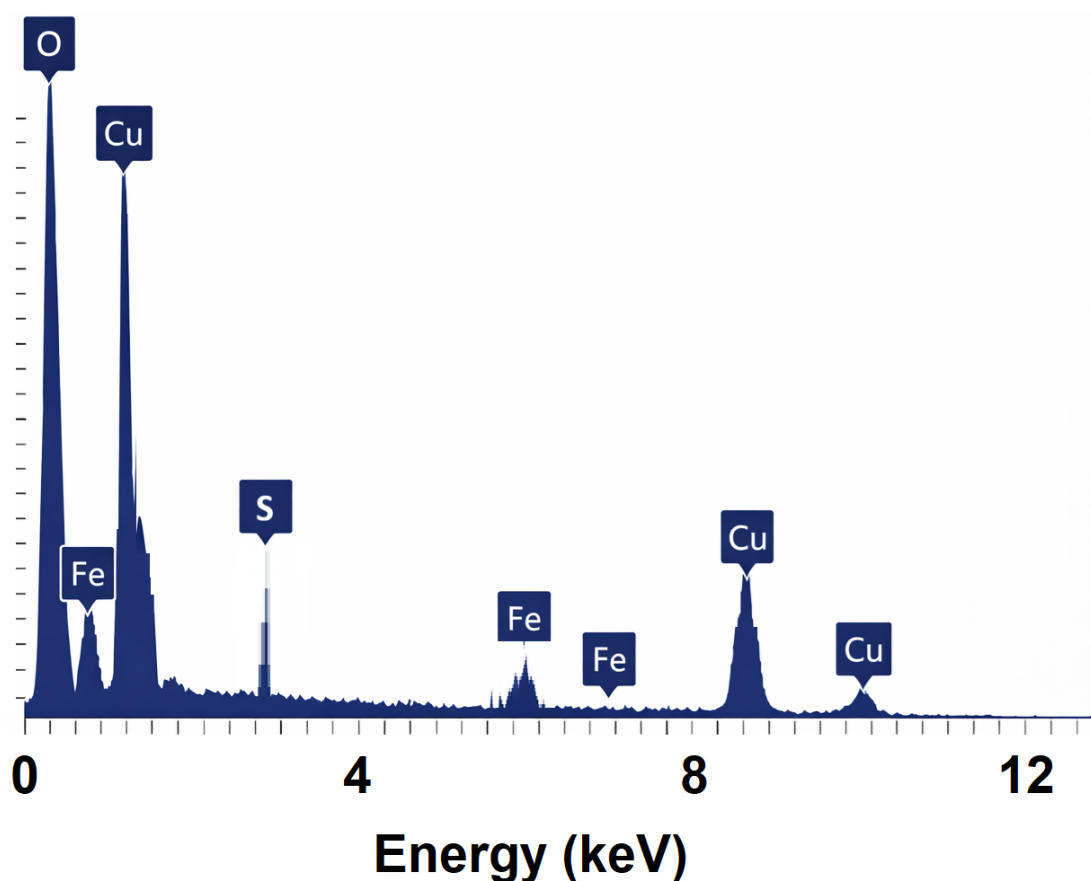

Fig. S1. EDX analysis of S@CuFe<sub>2</sub>O<sub>4</sub> nanoparticles

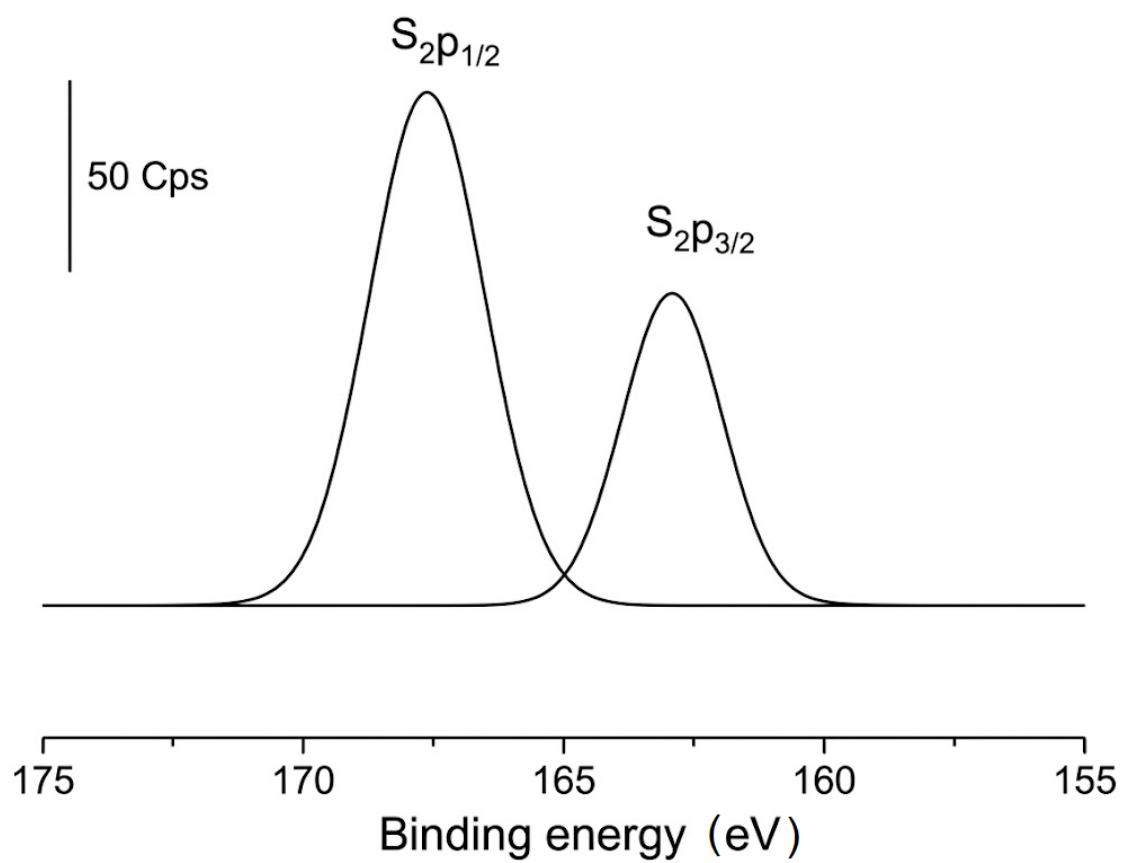

**Fig. S2.** The narrow region XPS spectra of S@CuFe<sub>2</sub>O<sub>4</sub>/QCM chip for the deconvolution spectra of S<sub>2p</sub>

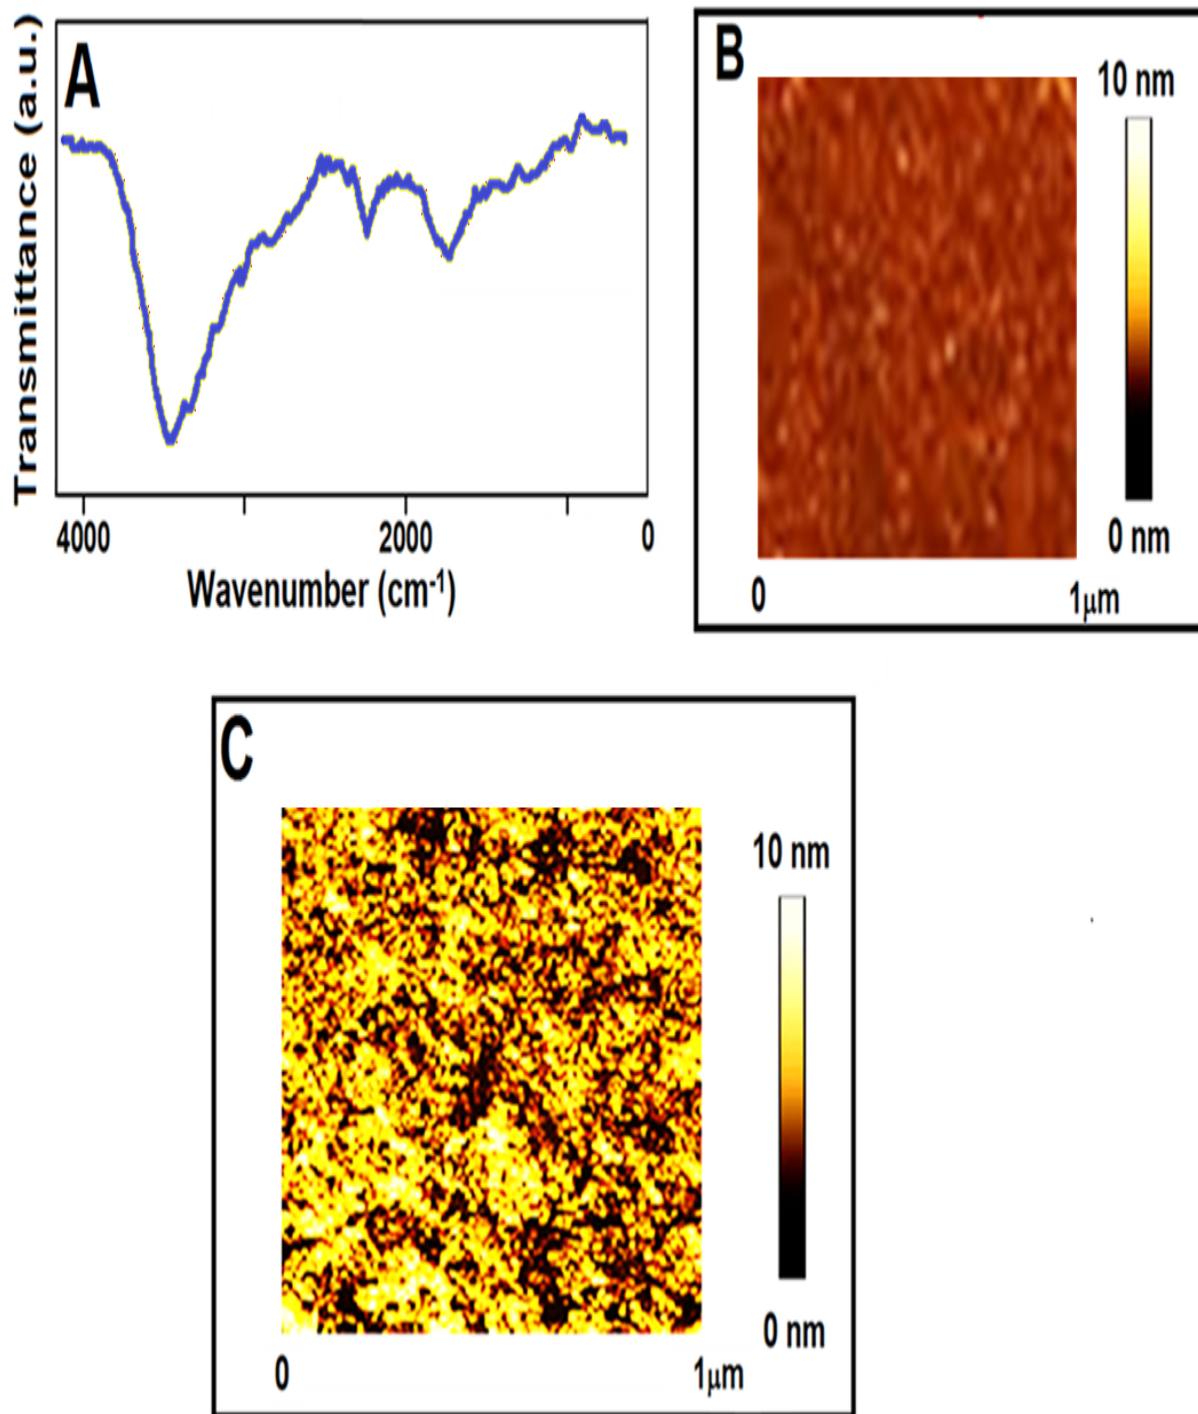

**Fig. S3.** (A) FTIR spectra of ACE-imprinted film on S@CuFe<sub>2</sub>O<sub>4</sub>/QCM with ACE removal; AFM images of (B) bare QCM chip and (C) ACE-imprinted film on S@CuFe<sub>2</sub>O<sub>4</sub>/QCM with ACE removal

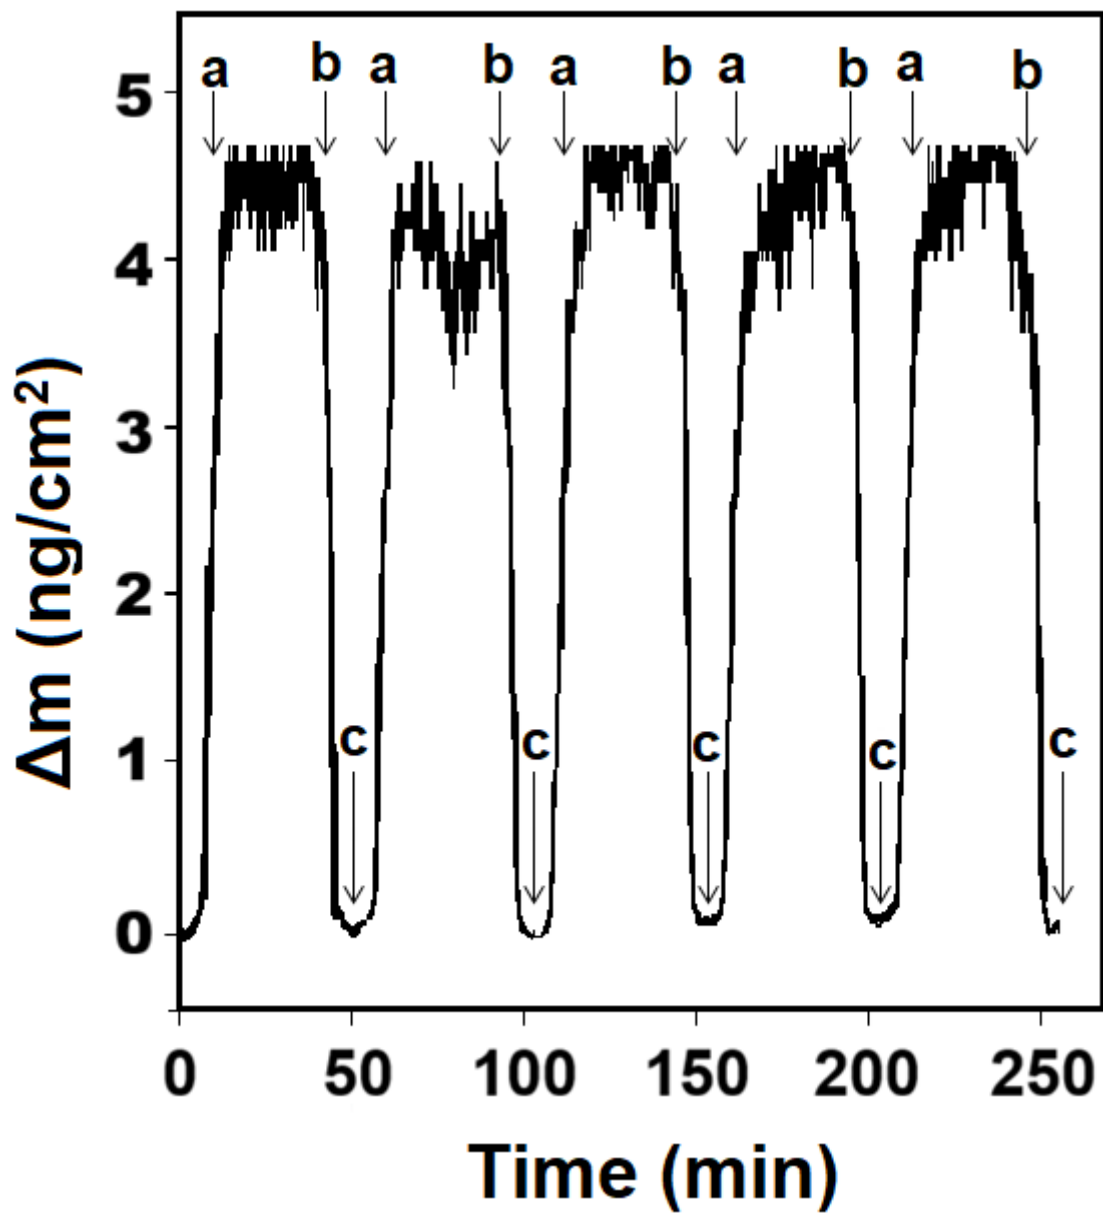

**Fig. S4.** Repeatability of MIP/S@CuFe<sub>2</sub>O<sub>4</sub>/QCM chip: (a) adsorption; (b) desorption; (c) regeneration

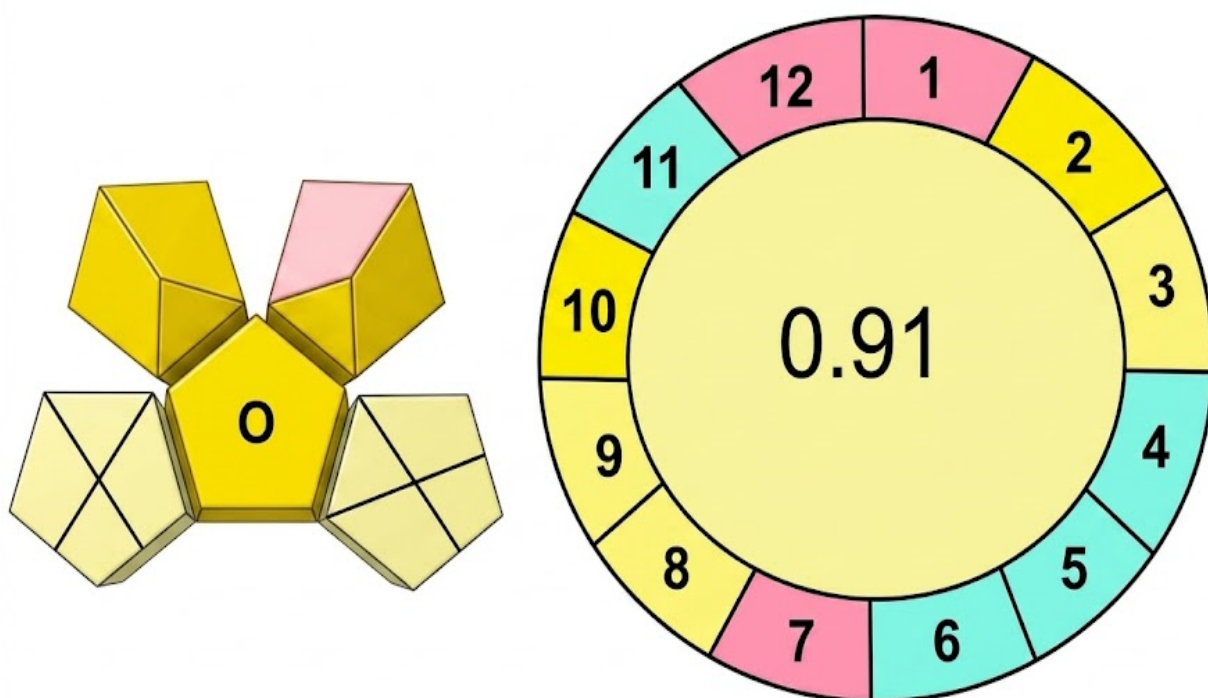

**Fig. S5.** Method greenness assessment tools pictograms

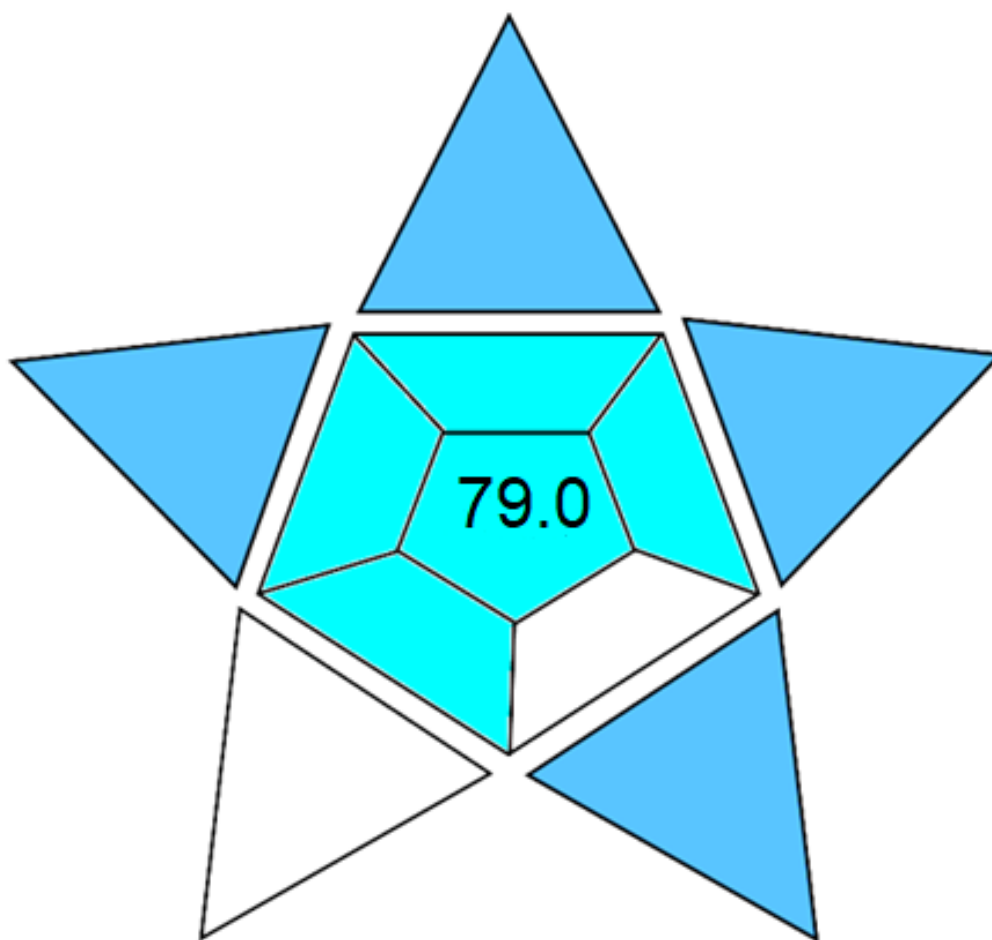

**Fig. S6.** Practicality assessment of MIP/S@CuFe<sub>2</sub>O<sub>4</sub>/QCM chip using BAGI tools

**Table S1.** *k* and *k'* values of MIP/S@CuFe<sub>2</sub>O<sub>4</sub>/QCM chip and NIP/S@CuFe<sub>2</sub>O<sub>4</sub>/QCM chip (*n*=6)

|     | MIP                               |          | NIP                               |          |           |
|-----|-----------------------------------|----------|-----------------------------------|----------|-----------|
|     | $\Delta m$ (ng cm <sup>-2</sup> ) | <i>k</i> | $\Delta m$ (ng cm <sup>-2</sup> ) | <i>k</i> | <i>k'</i> |
| ACE | 5.50 ± 0.01                       | -        | 0.100 ± 0.003                     | -        | -         |
| MAL | 0.30 ± 0.01                       | 18.33    | 0.020 ± 0.001                     | 5.00     | 3.67      |
| TRI | 0.20 ± 0.02                       | 27.50    | 0.010 ± 0.002                     | 10.00    | 2.75      |
| CHL | 0.10 ± 0.03                       | 55.00    | 0.005 ± 0.004                     | 20.00    | 2.75      |

Analyte concentrations: 5.0 nmol L<sup>-1</sup> ACE, 5.0 nmol L<sup>-1</sup> MAL, 5.0 nmol L<sup>-1</sup> TRI, and 5.0 nmol L<sup>-1</sup> CHL
